# Supplementary material for: Synthesis of ultra-small BaLuF5:Yb3+,Er3+@BaLuF5:Yb3+ active-core–active-shell nanoparticles with enhanced up-conversion and down-conversion luminescence by a layer-by-layer strategy
Source: Royal Society of Chemistry journal article supplement (doi:10.1039/c4tc02541e), 2014-12-31
Supplement: c4tc02541e1.pdf [file c4tc02541e1.pdf]

## Synthesis of ultra-small $\text{BaLuF}_5: \text{Yb}^{3+}, \text{Er}^{3+} @ \text{BaLuF}_5: \text{Yb}^{3+}$ active-core-active-shell nanoparticles with enhanced up-conversion and down-conversion luminescence by a layer-by-layer strategy

Yongling Zhang<sup>a</sup>, Xiaohui Liu<sup>a</sup>, Yanbo Lang<sup>a</sup>, Zhen Yuan<sup>b</sup>, Dan Zhao<sup>a\*</sup>, Guanshi Qin<sup>a\*</sup>, Weiping Qin<sup>a\*</sup>

5

### Supporting information

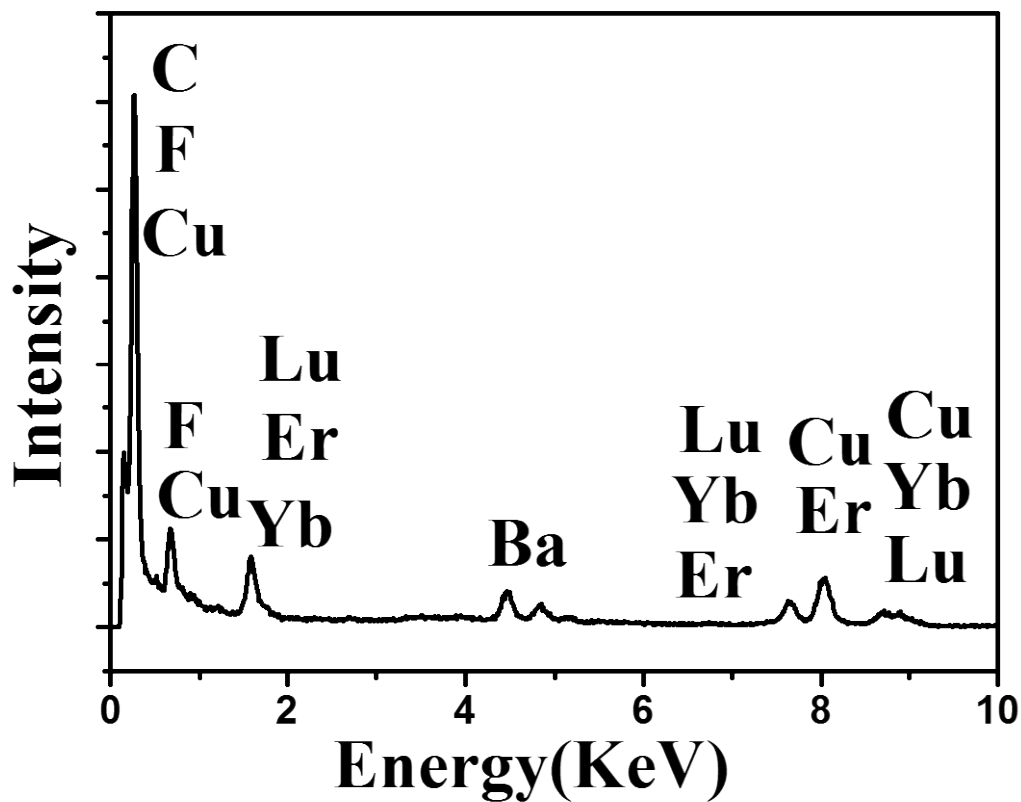

Fig. S1 The energy-dispersive X-ray spectrum of the  $\text{BaLuF}_5: 20\text{mol \%Yb}^{3+}, 2\text{mol \%Er}^{3+} @ \text{BaLuF}_5: 5\text{mol \% Yb}^{3+}$  NPs.
